1        **Novel and unexpected genetic and microbial diversity for**  
2                    **arsenic cycling in deep sea cold seep sediments**

3                    Chuwen Zhang<sup>1</sup>, Xinyue Liu<sup>1,2</sup>, Ling-Dong Shi<sup>3</sup>, Jiwei Li<sup>4</sup>,  
4                    Xi Xiao<sup>5</sup>, Zongze Shao<sup>1,6</sup>, Xiyang Dong<sup>1,6\*</sup>,

5        <sup>1</sup> Key Laboratory of Marine Genetic Resources, Third Institute of Oceanography,  
6        Ministry of Natural Resources, Xiamen, China

7        <sup>2</sup> School of Marine Sciences, Sun Yat-Sen University, Zhuhai, China

8        <sup>3</sup> College of Environmental and Resource Sciences, Zhejiang University, Hangzhou,  
9        China

10       <sup>4</sup> Institute of Deep-Sea Science and Engineering, Chinese Academy of Sciences,  
11       Sanya, China

12       <sup>5</sup> Key Laboratory of Marine Mineral Resources, Ministry of Natural Resources,  
13       Guangzhou Marine Geological Survey, China Geological Survey, Guangzhou, China

14       <sup>6</sup> Southern Marine Science and Engineering Guangdong Laboratory (Zhuhai), Zhuhai,  
15       China

16

17       \* Correspondence can be addressed to Xiyang Dong ([dongxiyang@tio.org.cn](mailto:dongxiyang@tio.org.cn)).

18

## 19 **Abstract**

20 Cold seeps, where cold hydrocarbon-rich fluid escapes from the seafloor, showed  
21 strong enrichment of toxic metalloid arsenic (As). The toxicity and mobility of As can  
22 be greatly altered by microbial processes that play an important role in global As  
23 biogeochemical cycling. However, a global overview of genes and microbes involved  
24 in As transformation at seeps remains to be fully unveiled. Using 87 sediment  
25 metagenomes and 33 metatranscriptomes derived from 13 globally distributed cold  
26 seeps, we show that As resistance genes (*arsM*, *arsP*, *arsC1/arsC2*, *acr3*) were  
27 prevalent at seeps and more phylogenetically diverse than previously expected.  
28 Asgardarchaeota and a variety of unidentified bacterial phyla (e.g. 4484-113,  
29 AABM5-125-24 and RBG-13-66-14) may also function as the key players in As  
30 transformation. The abundances of As-cycling genes and the compositions of  
31 As-associated microbiome shifted across different sediment depths or types of cold  
32 seep. The energy-conserving arsenate reduction or arsenite oxidation could impact  
33 biogeochemical cycling of carbon and nitrogen, via supporting carbon fixation,  
34 hydrocarbon degradation and nitrogen fixation. Overall, this study provides a  
35 comprehensive overview of As-cycling genes and microbes at As-enriched cold seeps,  
36 laying a solid foundation for further studies of As cycling in deep sea microbiome at  
37 the enzymatic and processual levels.

## 38 **Introduction**

39 Cold seeps are characterized by the emission of subsurface fluids into the sea floor  
40 and occur widely at active and passive continental margins<sup>1,2</sup>. The upward fluids are  
41 often rich in methane and other hydrocarbons which sustain sea bed oases composed of  
42 various microorganisms and faunal assemblages<sup>3,4</sup>. The primary process that fuels  
43 complex cold seep ecosystems is the anaerobic oxidation of methane (AOM),  
44 conjointly operated by a consortium of anaerobic methane-oxidizing archaea (ANME)  
45 and sulfate-reducing bacteria (SRB)<sup>5,6</sup>. AOM removes approximately 80% of upward  
46 venting methane, acting as an efficient methane filter<sup>7</sup>. Additionally, deep-sea cold seep  
47 sediments also contain diverse and abundant diazotrophs that might contribute  
48 substantially to the global nitrogen balance<sup>8</sup>. Cold seeps are therefore biologically and  
49 geochemically significant on a global scale.

50 The venting fluids can significantly influence the sedimentary environment of seep  
51 sites, resulting in changes of chemical characteristics of sediments<sup>9</sup>. In particular,  
52 arsenic (As), one of the most abundant elements in the Earth's crust, are anomalously  
53 enriched in seep sediments<sup>10-14</sup>. The anomalous As enrichment could be attributed to  
54 the ascending fluids that could capture As and other metals when passing through  
55 thick shaly formations<sup>10,14</sup>; or the so-called particulate iron shuttle effect<sup>9,11,13</sup>. As is  
56 also a toxic metalloid in nature that, upon exposure, can cause negative effects for all  
57 living things<sup>15</sup>. Depending on the physicochemical conditions, As can be found in  
58 different oxidation and methylation states, showing various levels of toxicity and  
59 bioavailability<sup>16</sup>. In marine environments, arsenate (As(V)), and arsenite (As(III)) are  
60 the dominant forms of inorganic As<sup>17</sup>. It is assumed that microbes have evolved a  
61 genetic repertoire related to As cycling, dated back to at least 2.72 billion years ago<sup>18</sup>,  
62 <sup>19</sup>. As biotransformation processes include As resistance (detoxification) to mitigate  
63 toxicity and As respiration to conserve energy. The arsenic resistance is mainly  
64 achieved by two steps: cytoplasmic reduction of As(V) to As(III) by the ArsC protein

65 and subsequent extrusion of As(III) via ArsB or Acr3 pump<sup>20, 21</sup> (**Figure 1**). Another  
66 As detoxification mechanism involves the methylation of As(III) to methylarsenite  
67 (MAs(III)) by the ArsM enzyme<sup>22</sup> (**Figure 1**). Although MAs(III) intermediates are  
68 more toxic than As(III), they do not accumulate in cells and can be detoxified through  
69 several different pathways. MAs(III) can be further methylated by ArsM and  
70 volatilized, extruded from cells via the ArsP pump<sup>23</sup>, oxidated to less toxic MAs(V)  
71 by ArsH<sup>24</sup>, or demethylated to less toxic As(III) by the ArsI lyase<sup>25</sup>. As respiration  
72 consists of the chemolithotrophic oxidation of As(III) by AioAB/ArxAB and  
73 dissimilatory As(V) reduction by ArrAB<sup>15, 26</sup> (**Figure 1**). Taken together, microbes  
74 have a huge potential effect on the biogeochemical cycling and toxicity of As.

75 So far, As-transforming microbes and As-related genes have been widely investigated  
76 in various natural environments, including polluted and pristine soils<sup>27, 28</sup>, terrestrial  
77 geothermal springs<sup>29-31</sup>, wetlands<sup>32, 33</sup>, pelagic oxygen-deficient zones<sup>34</sup>,  
78 groundwater<sup>35</sup>, etc. For example, metagenomic and metatranscriptomic analyses  
79 revealed that Aquificae are the key players for the *arsC*-based detoxification in  
80 Tengchong geothermal springs<sup>29</sup>. A global survey also described the phylogenetic  
81 diversity, genomic location, and biogeography of As-related genes in soil  
82 metagenomes<sup>36</sup>. Only recently, the behavior of As biotransformation has been  
83 reported in the deep-sea realms, i.e. hadal trench of the Challenger Deep<sup>37</sup>. Deep-sea  
84 ecosystems cover 67% of Earth surface and have extremely high densities of microbes  
85 (up to 1000× greater than surface waters) which play a critical role for long-term  
86 controls on global biogeochemical cycles<sup>38, 39</sup>. The environmental conditions in deep  
87 seafloor cold seeps differ greatly from those in the aforementioned ecosystems, such  
88 as low temperatures, high pressure, darkness and the presence of seepage activities<sup>1</sup>.  
89 Thus, the investigation of As-related genes and microbes at seeps will expand our  
90 current knowledge on As metabolisms and allow us to discover new lineages  
91 containing As-related genes.

92 The purpose of this study was to decipher the microbial transformation of As in cold  
93 seep sediments at a global scale. Here, we applied a relatively comprehensive data set  
94 of 87 sediment metagenomes and 33 metatranscriptomes derived from 13  
95 geographically diverse cold seeps across global oceans (**Table S1**), to investigate  
96 As-associated genes and their host microbes. This study aims to address the following  
97 questions: (i) biogeography of As-cycling genes across global cold seeps; (ii)  
98 phylogenetic diversity and distribution of As-cycling genes across global cold seeps;  
99 (iii) interactions between As metabolisms and biogeochemical cycles of carbon and  
100 nitrogen.

## 101 **Results and discussion**

### 102 **As cycling genes are widespread and active across global cold seeps**

103 To gain a broad view on biogeography of As cycling genes, we determined their  
104 abundance from 87 sediment metagenomes collected from 13 globally distributed cold  
105 seeps. For comparison, we also calculated the abundance of *dsrA* genes whose products  
106 catalyzing the well-studied and predominated metabolic processes in cold seep  
107 ecosystems, i.e. sulfur oxidation and reduction<sup>40</sup>. We found that genes related to As  
108 resistance are prevalent in these cold seep samples (**Figure 2**) and their abundances are  
109 higher than those of *dsrA* genes (**Figure S2-S3; Table S2**). The *arsM* and *arsP* genes  
110 that respectively produce volatilized methylated organoarsenicals and mediate its  
111 subsequent expulsion outside cell, were the most abundant ones. The *arsC1/arsC2*  
112 genes for cytoplasmic As(V) reduction and the *acr3* gene for As(III) extrusion also  
113 dominated most cold seep samples. Moreover, As resistance genes, i.e. *arsM*, *arsP*,  
114 *arsC1/arsC2*, *acr3*, were actively expressed in the sediment metatranscriptomes from  
115 Haima and Jiaolong seeps along with gas hydrate deposit zones of Qiongdongnan and  
116 Shenhu, revealing *in situ* microbial activities on As detoxification (**Figure S4**). Seep  
117 microbes might utilize both methylation and cytoplasmic As(V) reduction strategies to

118 overcome potential toxic effects of exceptional As accumulation at cold seeps.  
119 Alternatively, methylation is not strictly a detoxification pathway but also an  
120 antibiotic-producing process with MAs(III) being a primitive antibiotic<sup>41</sup>, which could  
121 provide additional survival advantages. However, the function of *ArsM* in anoxic  
122 environments and its contribution to As cycling have yet to be verified. Our results  
123 contradict previous findings demonstrating that *arsM* are less common in soils<sup>36</sup> and  
124 hot springs<sup>29</sup> than *arsC*, but in line with those found in hadal sediments<sup>37</sup>. The  
125 discrepancy in As detoxification mechanisms between terrestrial and deep-sea  
126 ecosystems could be attributed to their huge variations in the habitats and geographical  
127 locations. When comparing the abundance of As(III) efflux pumps, we observed that  
128 *arsB* was in much lower abundance than *acr3* (**Figure 2a**). Previous studies also  
129 reported an abundance of *acr3* over *arsB* in forest soils and wetlands<sup>32, 36, 42</sup>. This is  
130 likely because *Acr3* proteins are more ancient and have greater phylogenetic  
131 distribution as compared with *ArsB*<sup>19</sup>. Conversely, genes related to energetic arsenic  
132 respiratory oxidation (*aioA*) and reduction (*arrA/arsA*) were less abundant in all cold  
133 seep samples as compared with arsenic detoxification genes. Despite of this, respiratory  
134 genes were transcriptionally active, as evidenced by the detection of *arrA* transcripts in  
135 Jiaolong seep (up to 15.9 TPM, **Figure S4**).

136 To determine the distribution characteristics of As cycling genes, each metagenome  
137 was categorized in terms of its sediment depth (i.e. surface: <1 mbsf; shallow: 1-10  
138 mbsf; deep: >10 mbsf). Metagenomes were also grouped based on the type of cold seep,  
139 including gas hydrate, seep (i.e. oil and gas/methane seep), and volcano (mud/asphalt  
140 volcano)<sup>1</sup>, respectively. The partial least squares discrimination analysis (PLS-DA)  
141 revealed dissimilarity in As cycling genes among different sediment layers (**Figure 2b**;  
142  $F = 4.3504$ ,  $p = 0.001$ ,  $R^2 = 0.10267$ , 999-permutations PERMANOVA test). The  
143 distribution traits of As cycling genes in surface sediments were separated from deep  
144 sediments and more similar to those in shallow ones (**Figure 2b**). The abundance of  
145 prevalent As cycling genes such as *acr3*, *arsC2* and *arsM* in deep sediments were

146 significantly higher as compared with those in shallow and surface sediments (**Figure**  
147 **S2**). As cycling genes in different types of cold seep were also different from each other  
148 (**Figure 2b**;  $F = 3.5246$ ,  $p = 0.004$ ,  $R^2 = 0.07742$ , 999-permutations PERMANOVA  
149 test). Dominant As cycling genes in gas hydrates displayed higher abundances as  
150 compared with those in seeps and volcanos (**Figure S3**). Hence, the distributions of  
151 As-associated genes were influenced by a combination of sediment depths and types of  
152 cold seep. The higher As-cycling gene abundance observed in our deep or gas  
153 hydrate-associated samples could be correlated with a high level of environmental As,  
154 as what described in As-rich altiplanic wetland<sup>32</sup>. In the Nankai Trough, As with  
155 unknown sources was demonstrated to actively release into sediments layers where  
156 methane hydrates occur (As concentration of 14 ppm in gas hydrate-bearing sediments  
157 vs av. 6.4 ppm for the whole sediment core)<sup>17</sup>.

#### 158 **Microbes involved in As cycling varied between seep habitats**

159 To profile taxonomic diversity of As-related microbes, a total of 1741 species-level  
160 metagenome-assembled genomes (MAGs, 95% average nucleotide identity) were  
161 reconstructed from these 87 cold seep metagenomes (**Table S3**). Of these, 1083 MAGs  
162 spanning 9 archaeal and 63 bacterial phyla as well as one unclassified bacterial phylum  
163 were potentially involved in As cycling at cold seeps (**Table S4**). Metagenomic read  
164 recruitments revealed that the recovered 1083 arsenic-related MAGs accounted for  
165 1.8-62.8% cold seep communities (**Figure 3 and Table S4**). Taxonomic compositions  
166 of As-related microbiomes across different types of cold seep displayed pronounced  
167 variations (**Figure 3**). In the sediments derived from oil and gas/methane seep,  
168 arsenic-related microbes contained mostly Methanogasteraceae (i.e. ANME-2c) and  
169 Methanocomedenaceae (i.e. ANME-2a) within Halobacteriota phylum, ETH-SRB1  
170 within Desulfobacterota phylum, JS1 within Atribacterota phylum as well as  
171 Anaerolineae and Dehalococcoidia within Chloroflexota phylum. The As-related  
172 microbes in gas hydrate sediments were dominated by bacterial lineages, highlighted

173 by Atribacterota (JS1) and Chloroflexota (Anaerolineae and Dehalococcoidia).  
174 Nevertheless, in asphalt/mud volcano sediments, the compositions of arsenic-related  
175 microbes were diverse in different samples. The clear distinctions in As-related  
176 microbiomes between different seep habitats suggested an important role driven by  
177 environment selection. Multiple parameters, including sediment temperature, sediment  
178 depth, water depth, methane concentration, and geographic distance have been  
179 demonstrated to cause these variations<sup>43, 44</sup>.

### 180 **Expanded diversity of microbial lineages containing As resistance genes**

181 Among these As resistance genes, *acr3*, *arsC1/arsC2*, *arsM* and *arsP* were widely  
182 distributed in bacteria and archaea, while other As resistance genes (*arsB*, *arsI* and  
183 *arsH*) were sparsely distributed (**Figure 4**). The *acr3* gene is typically affiliated with  
184 Proteobacterial, Firmicutes Actinobacterial and other bacterial sequences<sup>36, 42, 45</sup>. Our  
185 study observed an unexpectedly wider phylogenetical diversity of *acr3* than previously  
186 reported. Notably, Asgardarchaeota including Lokiarchaeia, Thorarchaeia, Sifarchaeia,  
187 LC30, along with Heimdallarchaeia and Wukongarchaeia described as the most likely  
188 sister group of eukaryotes, are firstly documented to have genetically capability for  
189 As(III) extrusion. The greater diversity of As resistance genes found in  
190 Asgardarchaeota phylum further point to their ancient origin<sup>19</sup>. Furthermore, a  
191 considerable number of candidate bacterial phyla without cultured representatives (e.g.  
192 4484-113, AABM5-125-24 and RBG-13-66-14) were also equipped with such an  
193 ability. Though their functional redundancy as As(III) efflux pumps, *arsB* was more  
194 phylogenetically conserved as compared with *acr3* and simply restricted to  
195 Alphaproteobacteria, Gammaproteobacteria and Campylobacterota (**Figure 4**). This  
196 observation is in agreement with previous reports comparing the diversity of *arsB* to  
197 *acr3*<sup>36, 42, 45</sup>. The *arsM* gene was relatively uncommon in terrestrial soil  
198 microorganisms<sup>29, 36</sup>. In contrast, this study showed that the *arsM* genes in seep  
199 microbes have a great taxonomic diversity similar to *acr3* gene, including



200 Chloroflexota, Proteobacteria, Atribacterota, Asgardarchaeota, Hydrothermarchaeota,  
201 Thermoplasmata, Thermoproteota as well as other currently unidentified bacterial  
202 phyla (e.g. 4484-113, AABM5-125-24 and RBG-13-66-14) (**Figure 4**). Among these,  
203 Atribacterota, Asgardarchaeota and the candidate bacterial phyla stated above have not  
204 previously been implicated in As methylation<sup>19, 36</sup>. For cytoplasmic As(V) reduction,  
205 Asgard archaeal lineages all lacked corresponding genes (*arsC1* and *arsC2*). In general,  
206 these data advance our understanding on the phylogenetical diversity of As resistance  
207 genes and highlight the potentially important role played by archaea in As cycling,  
208 Asgardarchaeota particularly.

### 209 **Novel seep lineages are identified to perform As respiration**

210 In addition to mitigating toxicity, some microorganisms can respire the redox-sensitive  
211 element of As to reap energetic gains (i.e. arsenotrophy), either via chemoautotrophic  
212 As(III) oxidation (*aioAB/arxAB*) or anaerobic As(V) respiration (*arrAB*)<sup>46, 47</sup>. The  
213 alpha subunits of these arsenotrophic enzymes form distinct clades with the  
214 dimethylsulfoxide (DMSO) reductase superfamily<sup>34</sup>. This superfamily also includes  
215 other enzymes critical in respiratory redox transformations, e.g. Nap and Nar. Here,  
216 we identified two AioA, three ArxA and 17 ArrA protein sequences, respectively. A  
217 phylogenetic analysis of recovered arsenotrophic protein sequences showed that they  
218 all clustered together with known AioA/ArxA and ArrA proteins (**Figure 5a**).  
219 Functional As bioenergetic *aioA/arxA* and *arrA* genes are generally found together  
220 with other necessary accessory genes. The *aioA* of As(III) oxidizing microorganisms  
221 always forms an operon with *aioB* and other genes involved in As resistance and  
222 metabolisms (e.g. *aioD*, *aioXSR*, *arsR*)<sup>15, 26</sup>. Arx is demonstrated to be a variant of Arr  
223 and these two enzymes have a similar genetic arrangement. The *arrA/arxA* gene is  
224 always found together with the *arrB/arxB* and often with the *arrC/arxC* and  
225 *arrD/arxD*<sup>15, 26</sup>. The genomic organization analysis showed that identified two *aioA*,  
226 three *arxA* and 11 of 17 *arrA* genes all have corresponding accessory genes (**Figure**

227 **5b)**, further confirming their potential identities as arsenotrophic enzymes.

228 The *aioA/arrA* genes are uncommon in soil microbiomes and mostly found in  
229 Proteobacteria<sup>15, 36, 48</sup>. By assigning the taxonomy, *aioA/arrA* genes recovered here  
230 belong to Gammaproteobacteria (n=3) and Alphaproteobacteria (n=2), consistent with  
231 previous findings (**Figure 3 and Figure 5c**). Nevertheless, 17 *arrA* genes were  
232 phylogenetically affiliated with seven distinct bacterial lineages: Bacteroidota (n=1),  
233 Chloroflexota (n=4), Deferribacterota (n=1), Desulfobacterota (n=8),  
234 Desulfobacterota\_I (n=1), Gammaproteobacteria (n=1), and Nitrospirota (n=1) (**Figure**  
235 **3 and Figure 5c**). Despite that several other bacterial lineages (i.e. Deferribacterota,  
236 Firmicutes and Chrysiogenetes) are reported to contain *arrA* genes, most known  
237 As(V)-respiring microorganisms are assigned to proteobacterial clades<sup>15, 36, 48</sup>. Our  
238 findings, the *arrA*-containing Bacteroidota, Chloroflexota and Nitrospirota, expand the  
239 database of putative dissimilatory As(V) reducers.

#### 240 **As respiration are potentially critical to central metabolisms in cold seeps**

241 Microbially mediated As respiration has been verified to influence biogeochemical  
242 cycles of carbon and nitrogen, e.g. chemoautotrophic As(III) oxidation coupled with  
243 denitrification<sup>49, 50</sup>. Here, functional annotation identified near-complete calvin and  
244 reductive TCA carbon fixation pathways in *aioA/arrA*-carrying Alphaproteobacteria  
245 (n=2) and Gammaproteobacteria MAGs (n=3) (**Figure 5c**). Terminal reductase  
246 systems were also recognized in *aioA/arrA*-carrying MAGs, i.e. nitrate reductase  
247 (*narGHI*). The cooccurrence of these genes suggests that the As(III) oxidation may  
248 help support autotrophic carbon fixation and nitrate reduction.

249 In addition, five *arrA*-carrying MAGs possessed genes for AssA (**Figure 5c**), which  
250 mediate the first step of anaerobic activation of alkanes via fumarate addition.  
251 Phylogenetic analyses revealed that identified AssA sequences were phylogenetically  
252 close to archaea-type and Group V AssA<sup>51</sup> (**Figure S5**). These potential hydrocarbon

253 degraders were classified as Chloroflexota (n=2), Deferribacterota (n=1),  
254 Desulfobacterota (n=1), and Bacteroidota (n=1). Methane, the simplest hydrocarbon,  
255 has been demonstrated to stimulate As(V) respiration during the process of anaerobic  
256 oxidation of methane<sup>52</sup>. Similarly, the occurrence of both *AssA* and *ArrA* indicated that  
257 heterotrophic MAGs stated above may also employ As(V) as electron acceptor for  
258 anaerobic degradation of multi-carbon alkanes. Genes encoding carbohydrate-active  
259 enzymes (CAZymes) targeting various complex carbohydrates were also present in  
260 these arsenotrophic MAGs, including chitin, pectin, starch and polyphenolics (**Figure**  
261 **5c**).

262 Notably, arsenotrophic MAGs may function as potential nitrogen fixers introducing  
263 new N to local environment. Genes encoding for the catalytic component of  
264 nitrogenase (i.e. *nifHDK*) were detected in one *arxA*-carrying (Gammaproteobacteria,  
265 n=1) and six *arrA*-carrying (Gammaproteobacteria, n=1; Desulfobacterota, n=4;  
266 Desulfobacterota\_I, n=1) MAGs (**Figure 5c**). It has been previously reported that  
267 As(III) oxidation can fuel biological nitrogen fixation in tailing and  
268 metal(loid)-contaminated soils<sup>53, 54</sup>. The data present here further complement that  
269 diazotrophs could also fix N<sub>2</sub> using energy obtained from dissimilatory As(V)  
270 reduction.

271 Our findings point towards a previously unrecognized arsenotrophs at seeps,  
272 impacting both carbon and nitrogen cycling. However, we acknowledge that  
273 cultivation experiments with As-respiring isolates are ultimately needed both to  
274 elucidate their lifestyle and confirm functionality for As-dependent carbon fixation,  
275 hydrocarbon and carbohydrate degradation as well as nitrogen fixation.

## 276 **Conclusions**

277 Microbial transformation of As has been well documented and characterized in  
278 environments in such as ocean water, groundwater and geothermal springs, but the

279 knowledge on gene- and genome-level As cycling in deep sea (e.g. cold seep) is limited.  
280 Our study demonstrated that As methylation and cytoplasmic As(V) reduction were the  
281 predominant detoxification mechanisms employed by cold seep microbiomes. These  
282 results substantially expanded the diversity of As resistance genes to a broader  
283 microbial community including Asgardarchaeota and a great number of candidate  
284 bacterial phyla. In addition, novel arsenotrophic lineages are also identified, including  
285 Bacteroidota, Chloroflexota, Nitrospirota, etc, which also potentially participate in  
286 carbon and nitrogen biogeochemical cycling. This study provides a detailed  
287 understanding of As biotransformation in a complex microbiome in deep-sea realms,  
288 which could have significant implications for addressing environmental issues. The  
289 identification of arsenotrophic microbes will also enable proxies for arsenic-based  
290 metabolisms in early anoxic oceans.

## 291 **Methods**

### 292 **Metagenomic and metatranscriptomic data sets**

293 The 87 metagenomes and 33 metatranscriptomes analyzed in this study are derived  
294 from 13 globally distributed cold seep sites (**Figure S1**). Among them, 65  
295 metagenomes and 10 metatranscriptomes were compiled from our previous  
296 publications<sup>8,55</sup>, and other 22 metagenomes were downloaded from NCBI Sequencing  
297 Read Archive (SRA). A detailed description of sampling locations and sequencing  
298 information for metagenomic and metatranscriptomic data is given in **Table S1**.

### 299 **Bioinformatic analyses**

300 DNA reads pre-processing, metagenomic assembly and binning were performed with  
301 the function modules of metaWRAP (v1.3.2)<sup>56</sup>. First, the metaWRAP Read\_qc module  
302 was used to trim raw sequencing DNA reads. Then the filtered DNA reads were

303 individually assembled with the metaWRAP Assembly module using Megahit<sup>57</sup> or  
304 metaSPAdes<sup>58</sup> with default settings (detailed assembly statistics are summarized in  
305 Table S1). In addition, metagenomic reads from the same sampling station (n=10) were  
306 also co-assembled using Megahit with the default settings. Thereafter, MAGs were  
307 recovered from contigs with the length longer than 1kb using the metaWRAP Binning  
308 module (parameters: -maxbin2 -concoct -metabat2) or the VAMB tool<sup>59</sup> (v3.0.1;  
309 default parameters; detailed binning statistics are summarized in **Table S1**). Further  
310 refinement of MAGs was performed by the Bin\_refinement module of metaWRAP  
311 (parameters: -c 50 -x 10), and CheckM (v1.0.12)<sup>60</sup> was used to estimate the  
312 completeness and contamination of these MAGs. All MAGs were dereplicated at 95%  
313 average nucleotide identity (ANI) using dRep (v3.4.0; parameters: -comp 50 -con 10)<sup>61</sup>  
314 to obtain representative species MAGs. This analysis provided a non-redundant  
315 genome set consisting of 1,741 species-level MAGs.

316 Raw metatranscriptomes were quality filtered with the Read\_qc module of metaWRAP  
317 (v1.3.2)<sup>56</sup> as described above. The removal of ribosomal RNAs was conducted with  
318 sortmeRNA (v2.1)<sup>62</sup> in the quality-controlled metatranscriptomic reads.

### 319 **Non-redundant gene catalog construction**

320 Genes were predicted on contigs ( $\geq 1$ kb) from the assemblies using the METABOLIC  
321 pipeline (v4.0)<sup>63</sup>, which resulted in 33,799,667 protein-coding genes. Clustering of the  
322 predicted proteins was performed with MMseqs2 (v13.45111)<sup>64</sup> using the cascaded  
323 clustering algorithm at 95% sequence similarity and 90% sequence coverage  
324 (parameters: -c 0.95 -min-seq-id 0.95 -cov-mode 1 -cluster-mode 2) following the ref.<sup>65</sup>.  
325 This process yielded a total of 17,217,131 non-redundant gene clusters.

### 326 **Searching for arsenic cycling genes**

327 In this study, 11 well-characterized marker genes<sup>66, 67</sup> were selected to assess their

328 potential influence to the arsenic biogeochemical cycle. These genes include eight  
329 arsenic resistance genes (*acr3*, *arsB*, *arsC1*, *arsC2*, *arsP*, *arsH*, *arsI*, and *arsM*) and  
330 three arsenic respiratory genes (*aioA*, *arrA*, and *arxA*). A hidden Markov model  
331 (HMM)-based search was performed to identify arsenic-related genes in  
332 non-redundant gene catalogue by using *hmmsearch* function in HMMER package  
333 (v3.1b2)<sup>68</sup>. The HMM profile searches and score cutoffs for 11 arsenic-related genes  
334 were taken from Lavy et al. (2020)<sup>67</sup>.

### 335 **Taxonomic and functional profiling of MAGs**

336 Arsenic-related MAGs were taxonomically annotated using the *classify\_wf* function of  
337 the GTDB-Tk toolkit (v2.1.1)<sup>69</sup> with default parameters against the GTDB r207 release.  
338 For all MAGs, gene calling and metabolic pathway prediction were conducted with  
339 the METABOLIC pipeline (v4.0)<sup>63</sup>. Functional annotation of genomes was also carried  
340 out by searching against KEGG, Pfam, MEROPS and dbCAN databases using DRAM  
341 (v1.3.5)<sup>70</sup>. The identification of arsenic-related genes in MAGs was performed by  
342 searching against As-related HMM profiles from Lavy et al. (2020)<sup>67</sup> as reported above.  
343 Genes involved in anaerobic hydrocarbon degradation were screened using BLASTp  
344 (identity >30%, coverage >90%,  $e < 1 \times 10^{-20}$ ) against local protein databases<sup>51</sup>.

### 345 **Abundance calculations**

346 For contig level, the relative abundance of genes related to arsenic cycling across 87  
347 metagenomes were calculated from non-redundant gene catalog using the program  
348 Salmon (v1.9.0)<sup>71</sup> in the mapping-based mode (parameters: *-validateMappings -meta*).  
349 GPM (genes per million) values were used as a proxy for gene abundance as describe  
350 in ref.<sup>70</sup>. For genome level, the relative abundance of each MAG was profiled by  
351 mapping quality-trimmed reads from the 87 metagenomes against the MAGs using  
352 CoverM in genome mode (<https://github.com/wwood/CoverM>) (v0.6.1; parameters:

353 -min-read-percent-identity 0.95 -min-read-aligned-percent 0.75 -trim-min 0.10  
354 -trim-max 0.90 -m relative\_abundance).

355 To calculate the transcript abundance of As-related genes, we also mapped clean reads  
356 from the 33 metatranscriptomes to non-redundant gene catalog. The transcript  
357 abundance of each gene was calculated as the metric-TPM (transcripts per million).

### 358 **Phylogenetic analyses of functional genes**

359 For phylogeny inference, protein sequences of functional genes were aligned with  
360 MAFFT (v7.490, -auto option)<sup>72</sup>, and gap sequences were trimmed using trimAl (v.  
361 1.2.59, -automated1 option)<sup>73</sup>. Maximum likelihood phylogenetic trees were  
362 constructed for each genes using IQ-TREE (v2.12)<sup>74</sup> with the following options: -m  
363 TEST -bb 1000 -alrt 1000. Branch support was estimated using 1000 replicates of both  
364 ultrafast bootstrap approximation (UFBoot)) and Shimodaira-Hasegawa (SH)-like  
365 approximation likelihood ratio (aLRT). Reference protein sequences for As-based  
366 respiratory cycle were obtained from Saunders et al. (2019)<sup>34</sup>. Reference protein  
367 sequences for fumarate addition were derived from Zhang et al. (2021)<sup>51</sup>. All the tree  
368 files were uploaded to Interactive tree of life (iTOL; v6)<sup>75</sup> for visualization and  
369 annotation.

### 370 **Statistical analyses**

371 Statistical analyses were done in R (v4.0.4-v4.1.0) with the following descriptions.  
372 Normality and homoscedasticity of data were evaluated using Shapiro-Wilk test and  
373 Levene's test, respectively. One-way analysis of variance (ANOVA) and least  
374 significant difference (LSD) test were conducted to evaluate the variations of each gene  
375 across different sediment depths and types of cold seeps. The partial least squares  
376 discrimination analysis (PLS-DA) was performed based on the GPM values of  
377 arsenic-cycling genes with R package 'mixOmics'. The permutational multivariate

378 analysis of variance (PERMANOVA) was employed to test whether arsenic-cycling  
379 genes shifted among different sediment depths and types of cold seeps using ‘adonis’  
380 function in vegan package. All PERMANOVA tests were performed with 9999  
381 permutations based on Bray–Curtis dissimilarity.

## 382 **DATA AVAILABILITY**

383 Genes and MAGs with As cycling genes, and files for the phylogenetic trees were  
384 deposited in Figshare (<https://doi.org/10.6084/m9.figshare.21550431>).

385

## 386 **References**

- 387 1. Joye, S. B., The Geology and Biogeochemistry of Hydrocarbon Seeps. *Annual Review of Earth*  
388 *and Planetary Sciences* **2020**, 48(1), 205-231.
- 389 2. Feng, D.; Qiu, J.-W.; Hu, Y.; Peckmann, J.; Guan, H.; Tong, H.; Chen, C.; Chen, J.; Gong, S.; Li,  
390 N.; Chen, D., Cold seep systems in the South China Sea: An overview. *Journal of Asian Earth Sciences*  
391 **2018**, 168(3-16).
- 392 3. Dubilier, N.; Bergin, C.; Lott, C., Symbiotic diversity in marine animals: the art of harnessing  
393 chemosynthesis. *Nature Reviews Microbiology* **2008**, 6(10), 725-740.
- 394 4. Levin, L. A., ECOLOGY OF COLD SEEP SEDIMENTS: INTERACTIONS OF FAUNA WITH  
395 FLOW, CHEMISTRY AND MICROBES. *Oceanography and Marine Biology* **2005**, 43(11-56).
- 396 5. Dong, X.; Rattray, J. E.; Campbell, D. C.; Webb, J.; Chakraborty, A.; Adebayo, O.; Matthews, S.;  
397 Li, C.; Fowler, M.; Morrison, N. M.; MacDonald, A.; Groves, R. A.; Lewis, I. A.; Wang, S. H.; Mayumi,  
398 D.; Greening, C.; Hubert, C. R. J., Thermogenic hydrocarbon biodegradation by diverse depth-stratified  
399 microbial populations at a Scotian Basin cold seep. *Nature communications* **2020**, 11(1), 5825-5825.
- 400 6. Kleindienst, S.; Herbst, F.-A.; Stagars, M.; von Netzer, F.; von Bergen, M.; Seifert, J.; Peplies, J.;  
401 Amann, R.; Musat, F.; Lueders, T.; Knittel, K., Diverse sulfate-reducing bacteria of the  
402 *Desulfosarcina/Desulfococcus* clade are the key alkane degraders at marine seeps. *The ISME Journal*  
403 **2014**, 8(10), 2029-2044.
- 404 7. Reeburgh, W. S., Oceanic methane biogeochemistry. *Chemical reviews* **2007**, 107(2), 486-513.
- 405 8. Dong, X.; Zhang, C.; Peng, Y.; Zhang, H.-X.; Shi, L.-D.; Wei, G.; Hubert, C. R. J.; Wang, Y.;  
406 Greening, C., Phylogenetically and catabolically diverse diazotrophs reside in deep-sea cold seep  
407 sediments. *Nature Communications* **2022**, 13(1), 4885.
- 408 9. Wang, Q.; Chen, D.; Peckmann, J., Iron shuttle controls on molybdenum, arsenic, and antimony  
409 enrichment in Pliocene methane-seep carbonates from the southern Western Foothills, Southwestern  
410 Taiwan. *Marine and Petroleum Geology* **2019**, 100(263-269).
- 411 10. Tribovillard, N.; du Châtelet, E. A.; Gay, A.; Barbécot, F.; Sansjofre, P.; Potdevin, J.-L.,  
412 Geochemistry of cold seepage-impacted sediments: Per-ascensum or per-descensum trace metal  
413 enrichment? *Chemical Geology* **2013**, 340(1-12).



- 414 11. Hu, Y.; Feng, D.; Peckmann, J.; Roberts, H. H.; Chen, D., New insights into cerium anomalies and  
415 mechanisms of trace metal enrichment in authigenic carbonate from hydrocarbon seeps. *Chemical*  
416 *Geology* **2014**, 381(55-66).
- 417 12. Carvalho, L.; Monteiro, R.; Figueira, P.; Mieiro, C.; Almeida, J.; Pereira, E.; Magalhães, V.;  
418 Pinheiro, L.; Vale, C., Vertical distribution of major, minor and trace elements in sediments from mud  
419 volcanoes of the Gulf of Cadiz: evidence of Cd, As and Ba fronts in upper layers. *Deep Sea Research*  
420 *Part I: Oceanographic Research Papers* **2018**, 131(133-143).
- 421 13. Tribovillard, N., Arsenic in marine sediments: how robust a redox proxy? *Palaeogeography,*  
422 *Palaeoclimatology, Palaeoecology* **2020**, 550(109745).
- 423 14. Cangemi, M.; Di Leonardo, R.; Bellanca, A.; Cundy, A.; Neri, R.; Angelone, M., Geochemistry  
424 and mineralogy of sediments and authigenic carbonates from the Malta Plateau, Strait of Sicily (Central  
425 Mediterranean): Relationships with mud/fluid release from a mud volcano system. *Chemical Geology*  
426 **2010**, 276(3), 294-308.
- 427 15. Andres, J.; Bertin, P. N., The microbial genomics of arsenic. *FEMS Microbiology Reviews* **2016**,  
428 40(2), 299-322.
- 429 16. Rahman, M. A.; Hassler, C., Is arsenic biotransformation a detoxification mechanism for  
430 microorganisms? *Aquatic Toxicology* **2014**, 146(212-219).
- 431 17. Masuda, H.; Yoshinishi, H.; Fuchida, S.; Toki, T.; Even, E., Vertical profiles of arsenic and arsenic  
432 species transformations in deep-sea sediment, Nankai Trough, offshore Japan. *Progress in Earth and*  
433 *Planetary Science* **2019**, 6(1), 28.
- 434 18. Sforza, M. C.; Philippot, P.; Somogyi, A.; van Zuilen, M. A.; Medjoubi, K.; Schoepp-Cothenet, B.;  
435 Nitschke, W.; Visscher, P. T., Evidence for arsenic metabolism and cycling by microorganisms 2.7  
436 billion years ago. *Nature Geoscience* **2014**, 7(11), 811-815.
- 437 19. Chen, S.-C.; Sun, G.-X.; Yan, Y.; Konstantinidis, K. T.; Zhang, S.-Y.; Deng, Y.; Li, X.-M.; Cui,  
438 H.-L.; Musat, F.; Popp, D.; Rosen, B. P.; Zhu, Y.-G., The Great Oxidation Event expanded the genetic  
439 repertoire of arsenic metabolism and cycling. *Proceedings of the National Academy of Sciences* **2020**,  
440 117(19), 10414.
- 441 20. Rosen, B. P., Biochemistry of arsenic detoxification. *FEBS Letters* **2002**, 529(1), 86-92.
- 442 21. Mukhopadhyay, R.; Rosen, B. P., Arsenate reductases in prokaryotes and eukaryotes.  
443 *Environmental health perspectives* **2002**, 110 Suppl 5(Suppl 5), 745-8.
- 444 22. Qin, J.; Rosen, B. P.; Zhang, Y.; Wang, G.; Franke, S.; Rensing, C., Arsenic detoxification and  
445 evolution of trimethylarsine gas by a microbial arsenite S-adenosylmethionine methyltransferase.  
446 *Proceedings of the National Academy of Sciences* **2006**, 103(7), 2075-2080.
- 447 23. Chen, J.; Madegowda, M.; Bhattacharjee, H.; Rosen, B. P., ArsP: a methylarsenite efflux  
448 permease. *Molecular Microbiology* **2015**, 98(4), 625-635.
- 449 24. Chen, J.; Bhattacharjee, H.; Rosen, B. P., ArsH is an organoarsenical oxidase that confers  
450 resistance to trivalent forms of the herbicide monosodium methylarsenate and the poultry growth  
451 promoter roxarsone. *Molecular Microbiology* **2015**, 96(5), 1042-1052.
- 452 25. Yoshinaga, M.; Rosen, B. P., A C·As lyase for degradation of environmental organoarsenical  
453 herbicides and animal husbandry growth promoters. *Proceedings of the National Academy of Sciences*  
454 **2014**, 111(21), 7701-7706.
- 455 26. Rascovan, N.; Maldonado, J.; Vazquez, M. P.; Eugenia Fariás, M., Metagenomic study of red

- 456 biofilms from Diamante Lake reveals ancient arsenic bioenergetics in haloarchaea. *The ISME Journal*  
457 **2016**, 10(2), 299-309.
- 458 27. Zhang, S. Y.; Xiao, X.; Chen, S. C.; Zhu, Y. G.; Sun, G. X.; Konstantinidis, K. T., High Arsenic  
459 Levels Increase Activity Rather than Diversity or Abundance of Arsenic Metabolism Genes in Paddy  
460 Soils. *Appl Environ Microbiol* **2021**, 87(20), e0138321.
- 461 28. Shi, L.-D.; Zhou, Y.-J.; Tang, X.-J.; Kappler, A.; Chistoserdova, L.; Zhu, L.-Z.; Zhao, H.-P.,  
462 Coupled Aerobic Methane Oxidation and Arsenate Reduction Contributes to Soil-Arsenic Mobilization  
463 in Agricultural Fields. *Environmental Science & Technology* **2022**.
- 464 29. Yin, Z.; Ye, L.; Jing, C., Genome-Resolved Metagenomics and Metatranscriptomics Reveal that  
465 Aquificae Dominates Arsenate Reduction in Tengchong Geothermal Springs. *Environmental Science &*  
466 *Technology* **2022**.
- 467 30. Hug, K.; Maher, W. A.; Stott, M. B.; Krikowa, F.; Foster, S.; Moreau, J. W., Microbial  
468 contributions to coupled arsenic and sulfur cycling in the acid-sulfide hot spring Champagne Pool, New  
469 Zealand. *Frontiers in Microbiology* **2014**, 5(
- 470 31. Zhang, S.-Y.; Zhao, F.-j.; Sun, G.; Su, J.; Yang, X.-R.; Li, H.; Zhu, Y.-g., Diversity and abundance  
471 of arsenic biotransformation genes in paddy soils from southern China. *Environmental science &*  
472 *technology* **2015**, 49 7(4138-46.
- 473 32. Castro-Severyn, J.; Pardo-Esté, C.; Mendez Katterinne, N.; Fortt, J.; Marquez, S.; Molina, F.;  
474 Castro-Nallar, E.; Remonsellez, F.; Saavedra Claudia, P., Living to the High Extreme: Unraveling the  
475 Composition, Structure, and Functional Insights of Bacterial Communities Thriving in the  
476 Arsenic-Rich Salar de Huasco Altiplanic Ecosystem. *Microbiology Spectrum* **2021**, 9(1), e00444-21.
- 477 33. Zhang, S.-Y.; Su, J.-Q.; Sun, G.-X.; Yang, Y.; Zhao, Y.; Ding, J.; Chen, Y.-S.; Shen, Y.; Zhu, G.;  
478 Rensing, C.; Zhu, Y.-G., Land scale biogeography of arsenic biotransformation genes in estuarine  
479 wetland. *Environmental Microbiology* **2017**, 19(6), 2468-2482.
- 480 34. Saunders, J. K.; Fuchsman, C. A.; McKay, C.; Rocap, G., Complete arsenic-based respiratory  
481 cycle in the marine microbial communities of pelagic oxygen-deficient zones. *Proceedings of the*  
482 *National Academy of Sciences* **2019**, 116(20), 9925.
- 483 35. Wang, L.; Yin, Z.; Jing, C., Metagenomic insights into microbial arsenic metabolism in shallow  
484 groundwater of Datong basin, China. *Chemosphere* **2020**, 245(125603.
- 485 36. Dunivin, T. K.; Yeh, S. Y.; Shade, A., A global survey of arsenic-related genes in soil microbiomes.  
486 *BMC Biology* **2019**, 17(1), 45.
- 487 37. Zhou, Y.-L.; Mara, P.; Cui, G.-J.; Edgcomb, V. P.; Wang, Y., Microbiomes in the Challenger Deep  
488 slope and bottom-axis sediments. *Nature Communications* **2022**, 13(1), 1515.
- 489 38. Jørgensen, B. B.; Boetius, A., Feast and famine — microbial life in the deep-sea bed. *Nature*  
490 *Reviews Microbiology* **2007**, 5(10), 770-781.
- 491 39. Orcutt, B. N.; Sylvan, J. B.; Knab, N. J.; Edwards, K. J., Microbial ecology of the dark ocean  
492 above, at, and below the seafloor. *Microbiol Mol Biol Rev* **2011**, 75(2), 361-422.
- 493 40. Müller, A. L.; Kjeldsen, K. U.; Rattei, T.; Pester, M.; Loy, A., Phylogenetic and environmental  
494 diversity of DsrAB-type dissimilatory (bi)sulfite reductases. *Isme j* **2015**, 9(5), 1152-65.
- 495 41. Chen, J.; Yoshinaga, M.; Rosen, B. P., The antibiotic action of methylarsenite is an emergent  
496 property of microbial communities. *Molecular microbiology* **2019**, 111(2), 487-494.
- 497 42. Achour, A. R.; Bauda, P.; Billard, P., Diversity of arsenite transporter genes from arsenic-resistant

- 498 soil bacteria. *Research in microbiology* **2007**, 158(2), 128-37.
- 499 43. Ruff, S. E.; Biddle, J. F.; Teske, A. P.; Knittel, K.; Boetius, A.; Ramette, A., Global dispersion and  
500 local diversification of the methane seep microbiome. *Proceedings of the National Academy of*  
501 *Sciences* **2015**, 112(13), 4015.
- 502 44. Inagaki, F.; Nunoura, T.; Nakagawa, S.; Teske, A.; Lever, M.; Lauer, A.; Suzuki, M.; Takai, K.;  
503 Delwiche, M.; Colwell, F. S.; Nealson, K. H.; Horikoshi, K.; D'Hondt, S.; Jørgensen, B. B.,  
504 Biogeographical distribution and diversity of microbes in methane hydrate-bearing deep marine  
505 sediments on the Pacific Ocean Margin. *Proceedings of the National Academy of Sciences of the United*  
506 *States of America* **2006**, 103(8), 2815.
- 507 45. Cai, L.; Liu, G.; Rensing, C.; Wang, G., Genes involved in arsenic transformation and resistance  
508 associated with different levels of arsenic-contaminated soils. *BMC Microbiology* **2009**, 9(1), 4.
- 509 46. Silver, S.; Phung Le, T., Genes and Enzymes Involved in Bacterial Oxidation and Reduction of  
510 Inorganic Arsenic. *Applied and Environmental Microbiology* **2005**, 71(2), 599-608.
- 511 47. Oremland, R. S.; Saltikov, C. W.; Stolz, J. F.; Hollibaugh, J. T., Autotrophic microbial  
512 arsenotrophy in arsenic-rich soda lakes. *FEMS Microbiology Letters* **2017**, 364(15), fnx146.
- 513 48. van Lis, R.; Nitschke, W.; Duval, S.; Schoepp-Cothenet, B., Arsenics as bioenergetic substrates.  
514 *Biochimica et biophysica acta* **2013**, 1827(2), 176-88.
- 515 49. Zhang, J.; Zhou, W.; Liu, B.; He, J.; Shen, Q.; Zhao, F. J., Anaerobic arsenite oxidation by an  
516 autotrophic arsenite-oxidizing bacterium from an arsenic-contaminated paddy soil. *Environ Sci Technol*  
517 **2015**, 49(10), 5956-64.
- 518 50. Rhine, E. D.; Phelps, C. D.; Young, L. Y., Anaerobic arsenite oxidation by novel denitrifying  
519 isolates. *Environ Microbiol* **2006**, 8(5), 899-908.
- 520 51. Zhang, C.; Meckenstock, R. U.; Weng, S.; Wei, G.; Hubert, C. R. J.; Wang, J.-H.; Dong, X.,  
521 Marine sediments harbor diverse archaea and bacteria with the potential for anaerobic hydrocarbon  
522 degradation via fumarate addition. *FEMS Microbiology Ecology* **2021**, 97(5), fiab045.
- 523 52. Shi, L.-D.; Guo, T.; Lv, P.-L.; Niu, Z.-F.; Zhou, Y.-J.; Tang, X.-J.; Zheng, P.; Zhu, L.-Z.; Zhu,  
524 Y.-G.; Kappler, A.; Zhao, H.-P., Coupled anaerobic methane oxidation and reductive arsenic  
525 mobilization in wetland soils. *Nature Geoscience* **2020**, 13(12), 799-805.
- 526 53. Li, Y.; Guo, L.; Häggblom, M. M.; Yang, R.; Li, M.; Sun, X.; Chen, Z.; Li, F.; Su, X.; Yan, G.;  
527 Xiao, E.; Zhang, H.; Sun, W., *Serratia* spp. Are Responsible for Nitrogen Fixation Fueled by As(III)  
528 Oxidation, a Novel Biogeochemical Process Identified in Mine Tailings. *Environ Sci Technol* **2022**,  
529 56(3), 2033-2043.
- 530 54. Li, Y.; Guo, L.; Yang, R.; Yang, Z.; Zhang, H.; Li, Q.; Cao, Z.; Zhang, X.; Gao, P.; Gao, W.; Yan,  
531 G.; Huang, D.; Sun, W., *Thiobacillus* spp. and *Anaeromyxobacter* spp. mediate arsenite  
532 oxidation-dependent biological nitrogen fixation in two contrasting types of arsenic-contaminated soils.  
533 *Journal of hazardous materials* **2022**, 443(Pt A), 130220.
- 534 55. Zhang, C.; Fang, Y.-X.; Yin, X.; Lai, H.; Kuang, Z.; Zhang, T.; Xu, X.-P.; Wegener, G.; Wang,  
535 J.-H.; Dong, X., The majority of microorganisms in gas hydrate-bearing subsurface sediments ferment  
536 macromolecules. *bioRxiv* **2022**, 2022.05.19.492412.
- 537 56. Uritskiy, G. V.; DiRuggiero, J.; Taylor, J., MetaWRAP—a flexible pipeline for genome-resolved  
538 metagenomic data analysis. *Microbiome* **2018**, 6(1), 158.
- 539 57. Li, D.; Liu, C.-M.; Luo, R.; Sadakane, K.; Lam, T.-W., MEGAHIT: an ultra-fast single-node

- 540 solution for large and complex metagenomics assembly via succinct de Bruijn graph. *Bioinformatics*  
541 **2015**, 31(10), 1674-1676.
- 542 58. Nurk, S.; Meleshko, D.; Korobeynikov, A.; Pevzner, P. A., metaSPAdes: a new versatile  
543 metagenomic assembler. *Genome Res* **2017**, 27(5), 824-834.
- 544 59. Nissen, J. N.; Johansen, J.; Allesøe, R. L.; Sønderby, C. K.; Armenteros, J. J. A.; Grønbech, C. H.;  
545 Jensen, L. J.; Nielsen, H. B.; Petersen, T. N.; Winther, O.; Rasmussen, S., Improved metagenome  
546 binning and assembly using deep variational autoencoders. *Nature Biotechnology* **2021**, 39(5),  
547 555-560.
- 548 60. Parks, D. H.; Imelfort, M.; Skennerton, C. T.; Hugenholtz, P.; Tyson, G. W., CheckM: assessing  
549 the quality of microbial genomes recovered from isolates, single cells, and metagenomes. *Genome Res*  
550 **2015**, 25(7), 1043-1055.
- 551 61. Olm, M. R.; Brown, C. T.; Brooks, B.; Banfield, J. F., dRep: a tool for fast and accurate genomic  
552 comparisons that enables improved genome recovery from metagenomes through de-replication. *The*  
553 *Isme Journal* **2017**, 11(2864).
- 554 62. Kopylova, E.; Noé, L.; Touzet, H., SortMeRNA: fast and accurate filtering of ribosomal RNAs in  
555 metatranscriptomic data. *Bioinformatics* **2012**, 28(24), 3211-3217.
- 556 63. Zhou, Z.; Tran, P.; Liu, Y.; Kieft, K.; Anantharaman, K., METABOLIC: a scalable  
557 high-throughput metabolic and biogeochemical functional trait profiler based on microbial genomes.  
558 *bioRxiv* **2019**, 761643.
- 559 64. Steinegger, M.; Söding, J., Clustering huge protein sequence sets in linear time. *Nature*  
560 *Communications* **2018**, 9(1), 2542.
- 561 65. Delgado, L. F.; Andersson, A. F., Evaluating metagenomic assembly approaches for  
562 biome-specific gene catalogues. *Microbiome* **2022**, 10(1), 72.
- 563 66. Keren, R.; Méheust, R.; Santini, J. M.; Thomas, A.; West-Roberts, J.; Banfield, J. F.;  
564 Alvarez-Cohen, L., Global genomic analysis of microbial biotransformation of arsenic highlights the  
565 importance of arsenic methylation in environmental and human microbiomes. *Comput Struct*  
566 *Biotechnol J* **2022**, 20(559-572).
- 567 67. Lavy, A.; Matheus Carnevali, P. B.; Keren, R.; Bill, M.; Wan, J.; Tokunaga, T. K.; Williams, K. H.;  
568 Hubbard, S. S.; Banfield, J. F., Taxonomically and metabolically distinct microbial communities with  
569 depth and across a hillslope to riparian zone transect. *bioRxiv* **2020**, 768572.
- 570 68. Johnson, L. S.; Eddy, S. R.; Portugaly, E., Hidden Markov model speed heuristic and iterative  
571 HMM search procedure. *BMC bioinformatics* **2010**, 11(431).
- 572 69. Chaumeil, P.-A.; Mussig, A.; Philip, H.; Parks, D., GTDB-Tk: a toolkit to classify genomes with  
573 the Genome Taxonomy Database. *Bioinformatics* **2019**, 36(6), 1925-1927.
- 574 70. Shaffer, M.; Borton, M. A.; McGivern, B. B.; Zayed, A. A.; La Rosa, Sabina L.; Solden, L. M.;  
575 Liu, P.; Narrowe, A. B.; Rodríguez-Ramos, J.; Bolduc, B.; Gazitúa, M. C.; Daly, R. A.; Smith, G. J.;  
576 Vik, D. R.; Pope, P. B.; Sullivan, M. B.; Roux, S.; Wrighton, Kelly C., DRAM for distilling microbial  
577 metabolism to automate the curation of microbiome function. *Nucleic Acids Res* **2020**, 48(16),  
578 8883-8900.
- 579 71. Patro, R.; Duggal, G.; Love, M. I.; Irizarry, R. A.; Kingsford, C., Salmon provides fast and  
580 bias-aware quantification of transcript expression. *Nature Methods* **2017**, 14(4), 417-419.
- 581 72. Katoh, K.; Standley, D. M., A simple method to control over-alignment in the MAFFT multiple

- 582 sequence alignment program. *Bioinformatics* **2016**, 32(13), 1933-42.
- 583 73. Capella-Gutiérrez, S.; Silla-Martínez, J. M.; Gabaldón, T., trimAl: a tool for automated alignment  
584 trimming in large-scale phylogenetic analyses. *Bioinformatics* **2009**, 25(15), 1972-1973.
- 585 74. Nguyen, L. T.; Schmidt, H. A.; von Haeseler, A.; Minh, B. Q., IQ-TREE: a fast and effective  
586 stochastic algorithm for estimating maximum-likelihood phylogenies. *Mol Biol Evol* **2015**, 32(1),  
587 268-74.
- 588 75. Letunic, I.; Bork, P., Interactive tree of life (iTOL) v3: an online tool for the display and  
589 annotation of phylogenetic and other trees. *Nucleic Acids Res* **2016**, 44(W1), W242-W245.
- 590

591 **ACKNOWLEDGMENTS**

592 This study was supported by the Scientific Research Foundation of Third Institute of  
593 Oceanography, MNR (No. 2022025), the National Science Foundation of China (No.  
594 41906076), the Science and Technology Projects in Guangzhou (No. 202102020970),  
595 the Guangdong Basic and Applied Basic Research Foundation (No. 2019B030302004,  
596 20201910240000691) and the Marine Geological Survey Program of China Geological  
597 Survey (DD20221706).

598 **AUTHOR CONTRIBUTIONS**

599 XD designed this study with input from JL. CZ and XL analyzed omic data. XD, CZ,  
600 XL, LDS and ZS interpreted data. JL and XX contributed to data collection. XD and CZ  
601 drafted the paper, with input from all other authors.

602 **COMPETING INTERESTS**

603 The authors declare no competing interests.

## 604 **Figures Legends**

605 **Figure 1. Diagram of the microbial transformations of As.** As(III), arsenite; As(V),  
606 arsenate; MMAs(III), trivalent methylarsenite; MMAs(V), pentavalentmethylarsenate.  
607 As(III) efflux permease: ArsB/Acr3; cytoplasmic As(V) reductase: ArsC; respiratory  
608 As(V) reductase: ArrA; As(III) oxidase: AioA/ArxA; As(III) S-adenosylmethionine  
609 (SAM) methyltransferase: ArsM; non-heme iron-dependent dioxygenase: ArsI;  
610 MAs(III) efflux permease: ArsP; MAs(III) oxidase: ArsH.

611 **Figure 2. The global distribution of potential genes involved in As cycling at cold**  
612 **seeps.** (a) The abundances of As cycling genes across the 87 cold seep metagenomes.  
613 The abundance of each gene was normalized by the gene length and sequencing depth  
614 and represented as GPM (genes per million) value. (b) The partial least squares  
615 discrimination analysis (PLS-DA) plots based on the abundances of As-cycling genes.  
616 Similarity values among the samples of different sediment depths and types of cold  
617 seep were examined using a 999-permutation PERMANOVA test. Source data is  
618 available in **Table S2**.

619 **Figure 3. The community structures of microbiome involved in As cycling at cold**  
620 **seeps.** The relative abundance of each MAG was estimated using CoverM. The  
621 compositions of microbiome involved in As cycling across different types of cold  
622 seep were clustered based the Bray-Curtis distance. Detailed statistics for As-related  
623 microbiome are provided in **Table S4**.

624 **Figure 4. Phylogenetic distribution of As-cycling genes.** Left bar plot showing the  
625 total number of genomes encoded in each phylogenetic cluster assigned by GTDB-Tk  
626 based on GTDB r207 release. Right bubble plot showing the number of As-cycling  
627 genes encoded within each phylogenetic cluster. Detailed information on phylogenetic  
628 diversity of As-cycling genes is provided in **Table S5**.

629 **Figure 5. The metabolic potential of the arsenotrophic gene-carrying MAGs.** (a)  
630 A maximum-likelihood tree of the DMSO reductase family, with protein sequences  
631 identified as associated with arsenotrophic enzymes in this study. Bootstrap values are  
632 generated from 1000 replicates. Bootstrap values  $\geq 70$  are shown. Scale bar indicates  
633 amino acid substitutions per site (b) The genomic context of the *aiiA*, *arxA* and *arrA*  
634 clusters in MAGs containing arsenotrophic genes. (c) Heatmap showing the predicted  
635 metabolism in potential As-respiring microbes. Detailed annotation is presented in  
636 **Table S6.** The completeness of each pathway was calculated using the DRAM Distill  
637 function.



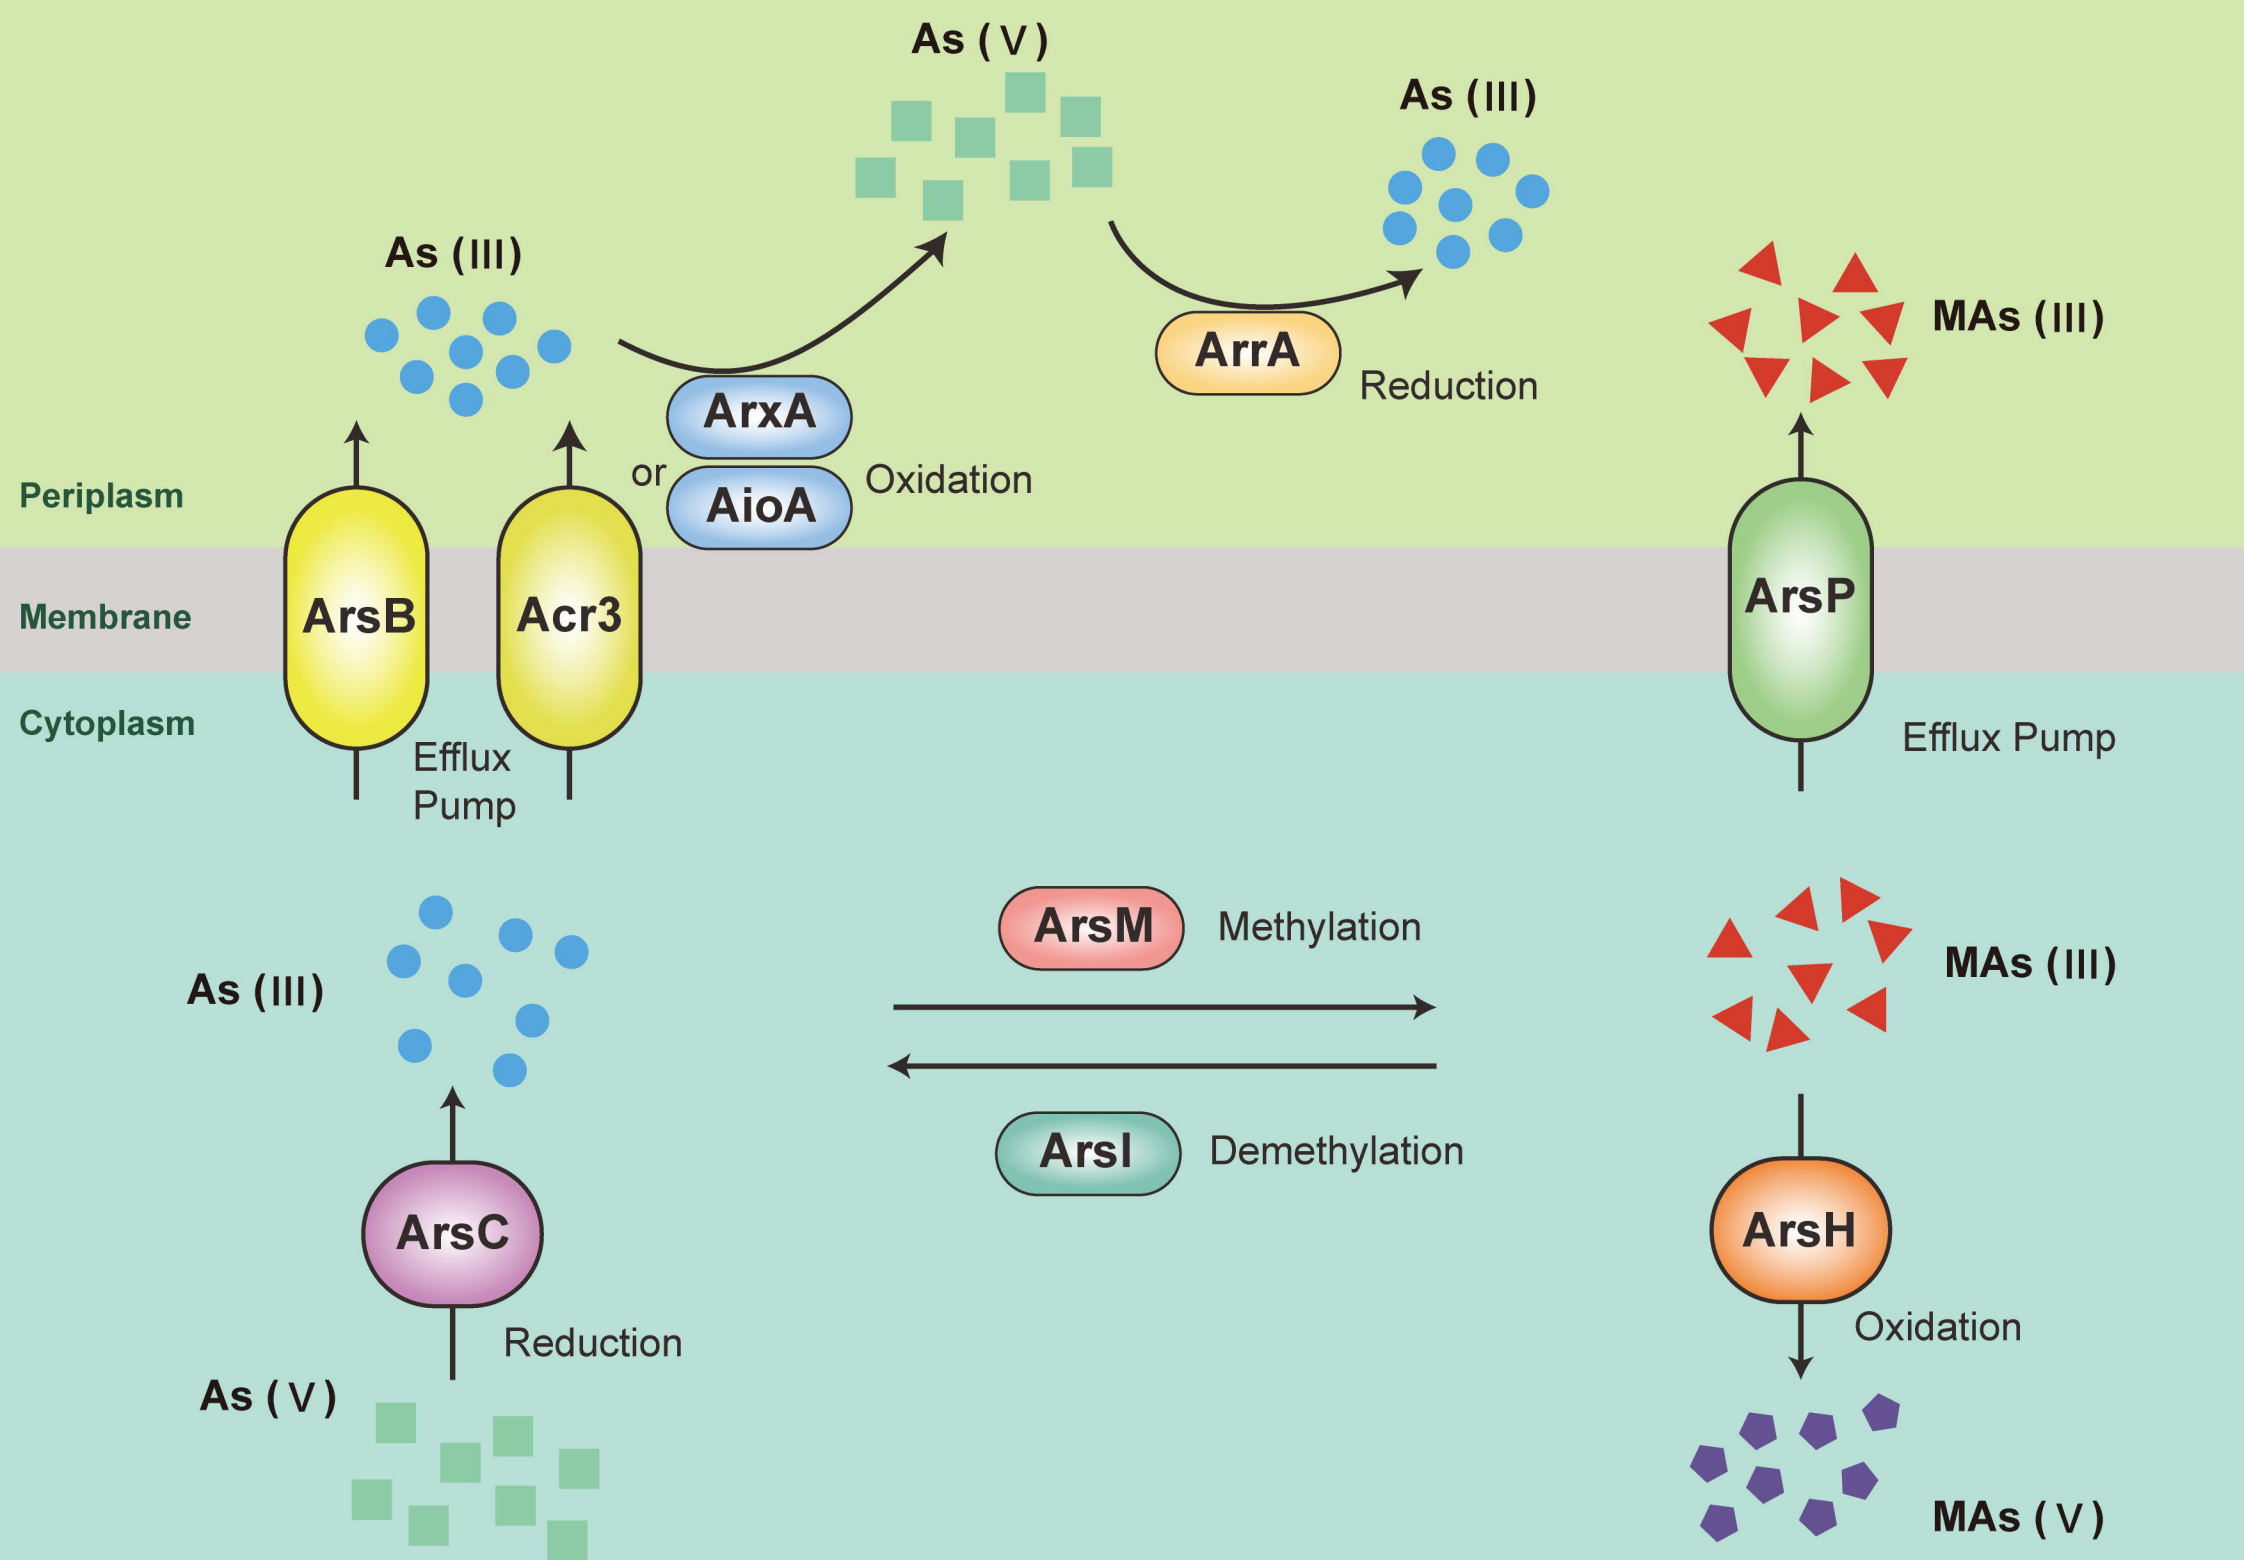

**a**

bioRxiv preprint doi: <https://doi.org/10.1101/2022.11.20.517286>; this version posted November 21, 2022. The copyright holder for this preprint (which was not certified by peer review) is the author/funder. All rights reserved. No reuse allowed without permission.

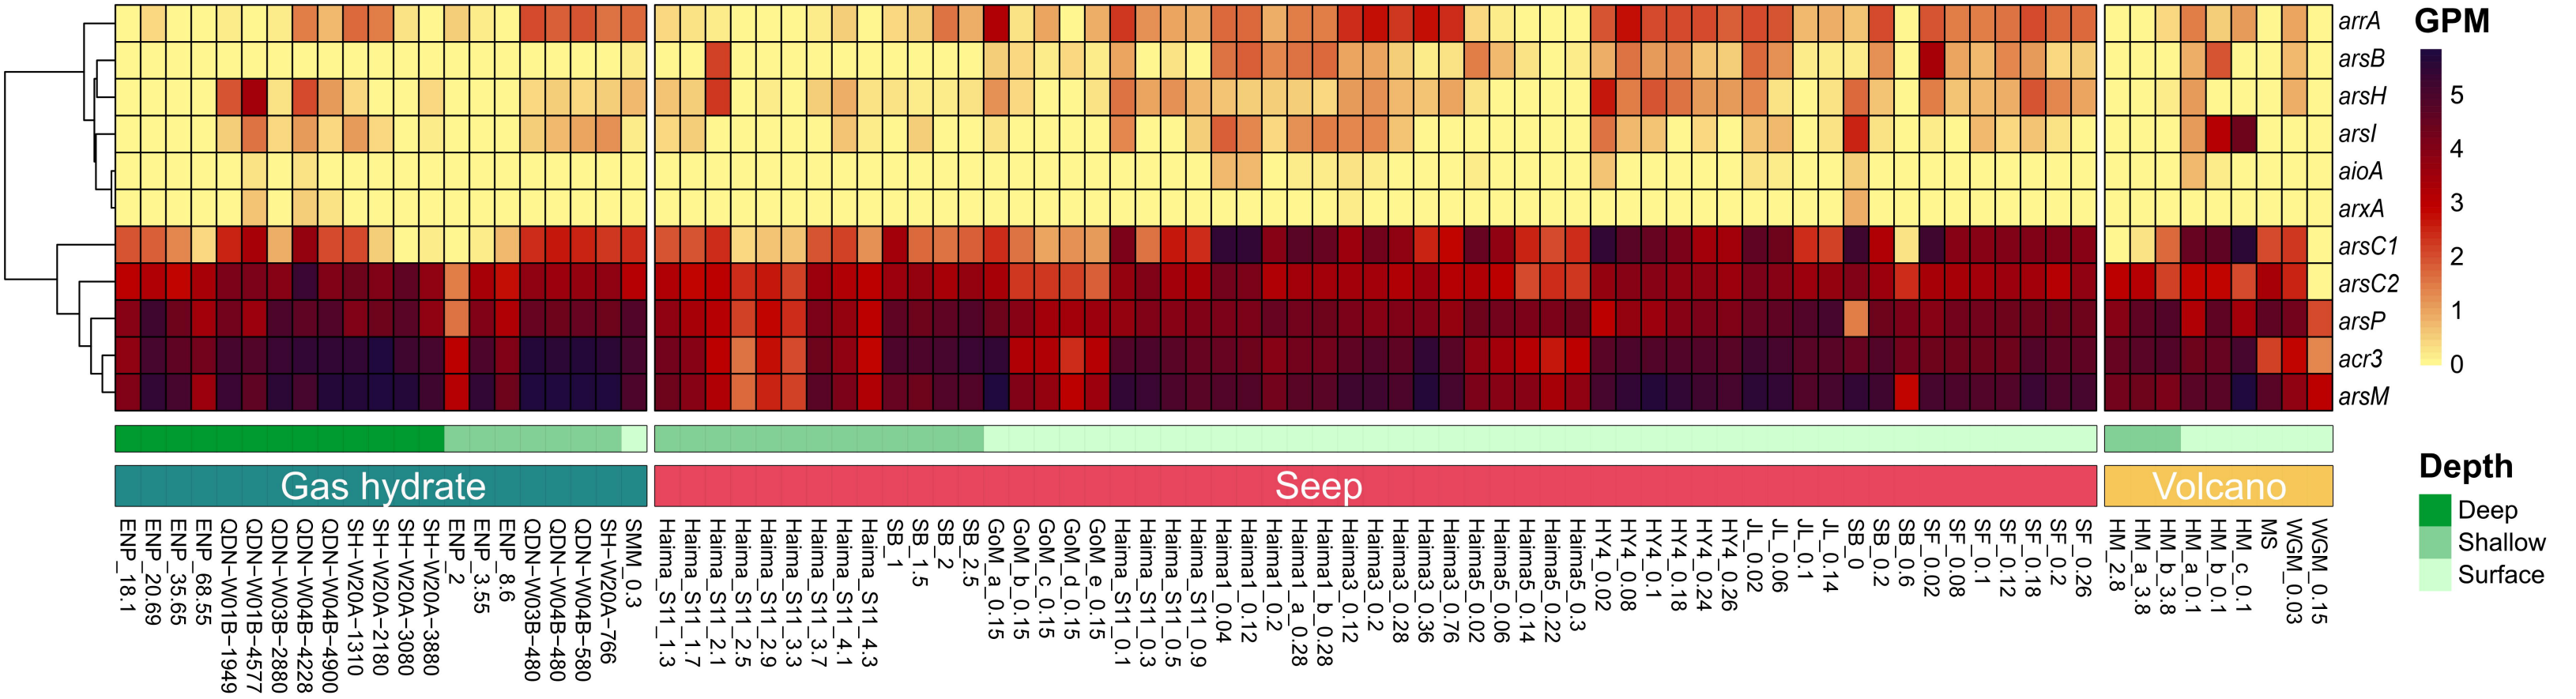**b**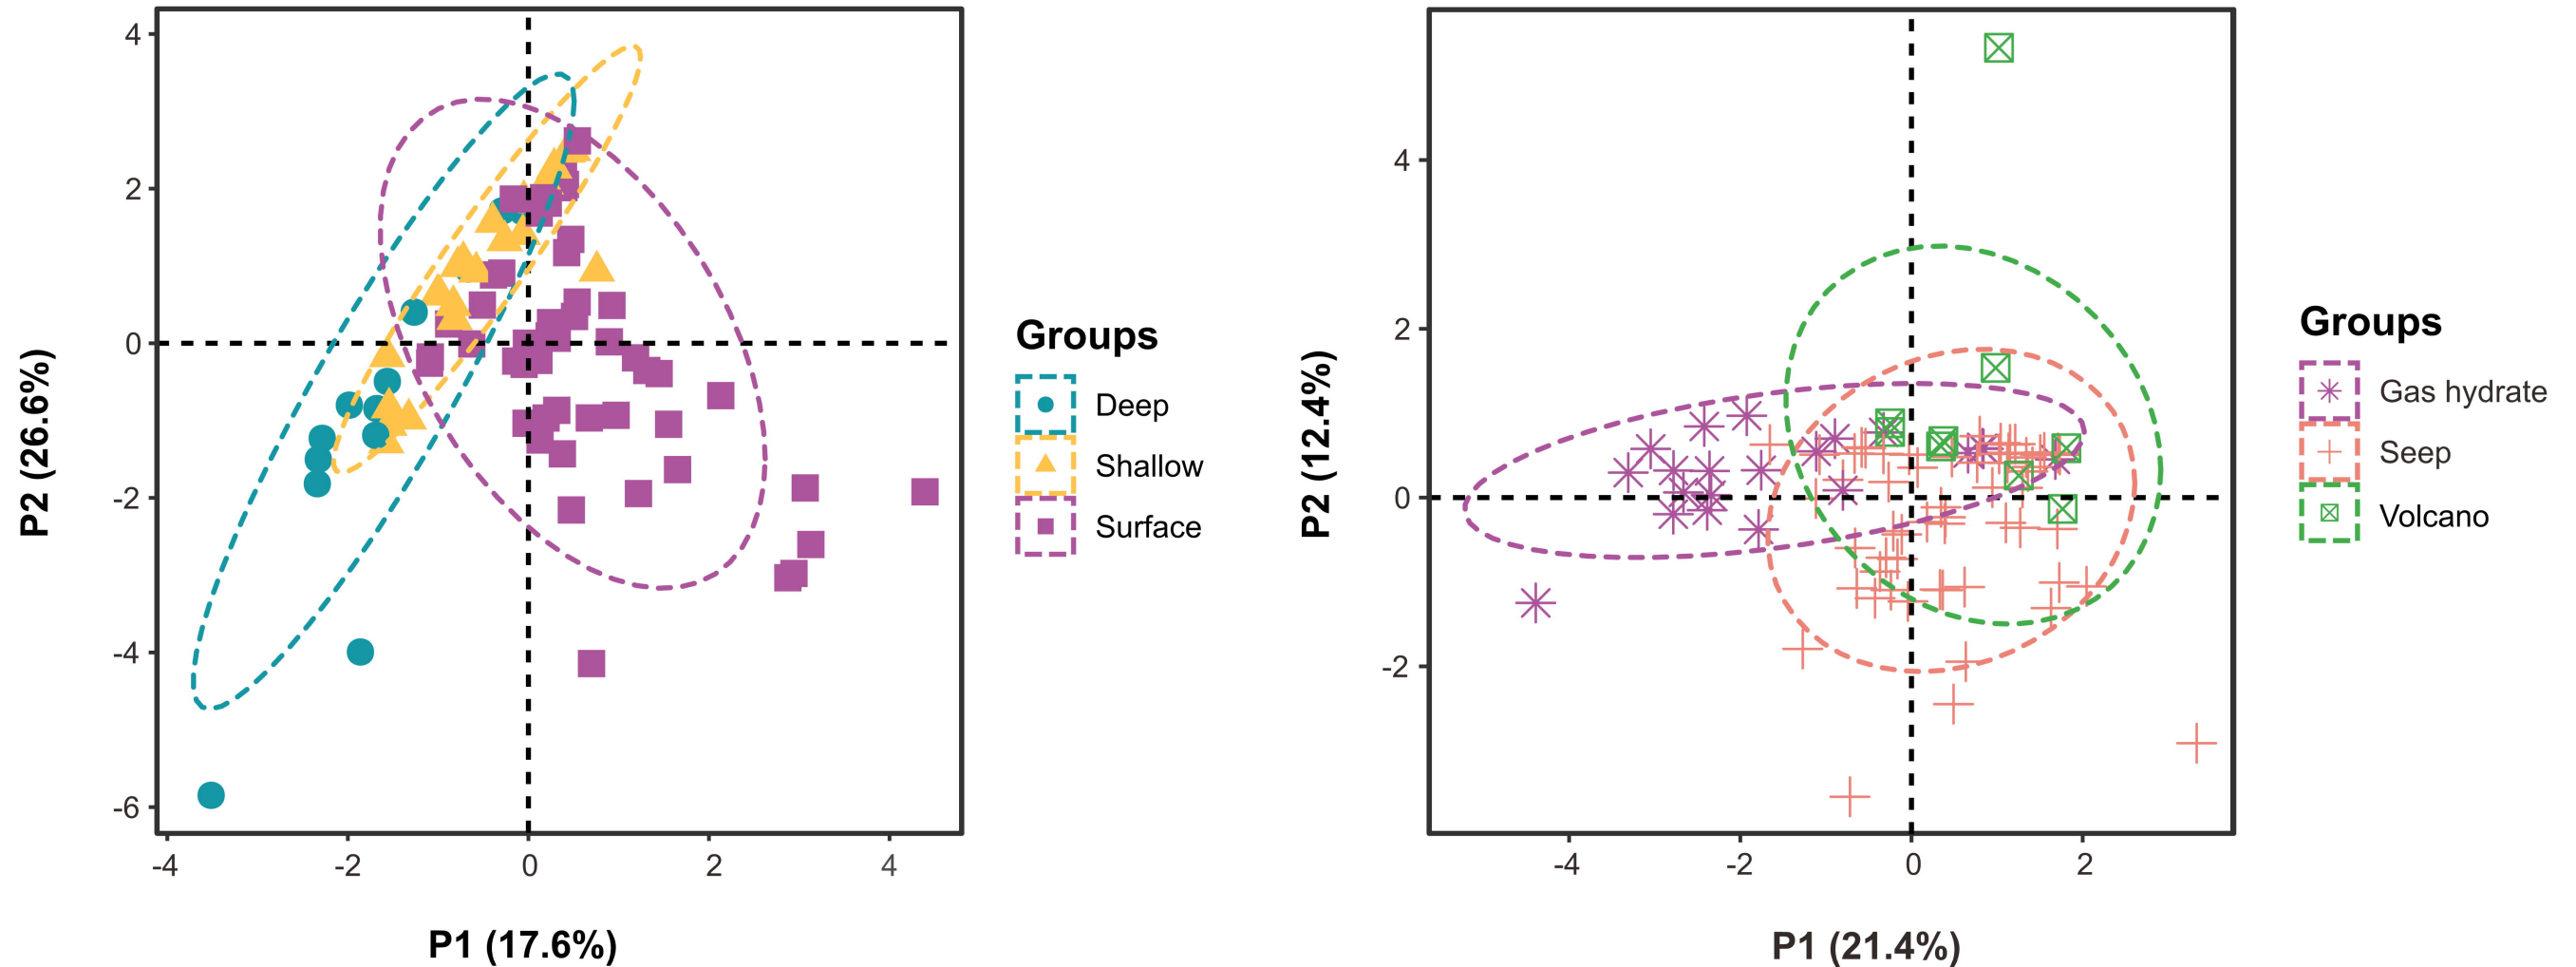

Tree

Relative abundance (%)

Types of cold seep

- gas hydrate
- seep
- volcano

Taxonomy

- Heimdallarchaeia
- Lokiarchaeia
- Hadarchaeota
- Halobacteriota
- Thermoplasmatota
- Thermoproteota
- Atribacterota
- Chloroflexota
- Desulfobacterota
- Planctomycetota
- Acidobacteriota
- Actinobacteriota
- Aerophobota
- Bacteroidota
- Campylobacterota
- Gammaproteobacteria
- UBA6262
- Verrucomicrobiota
- WOR-3
- Others

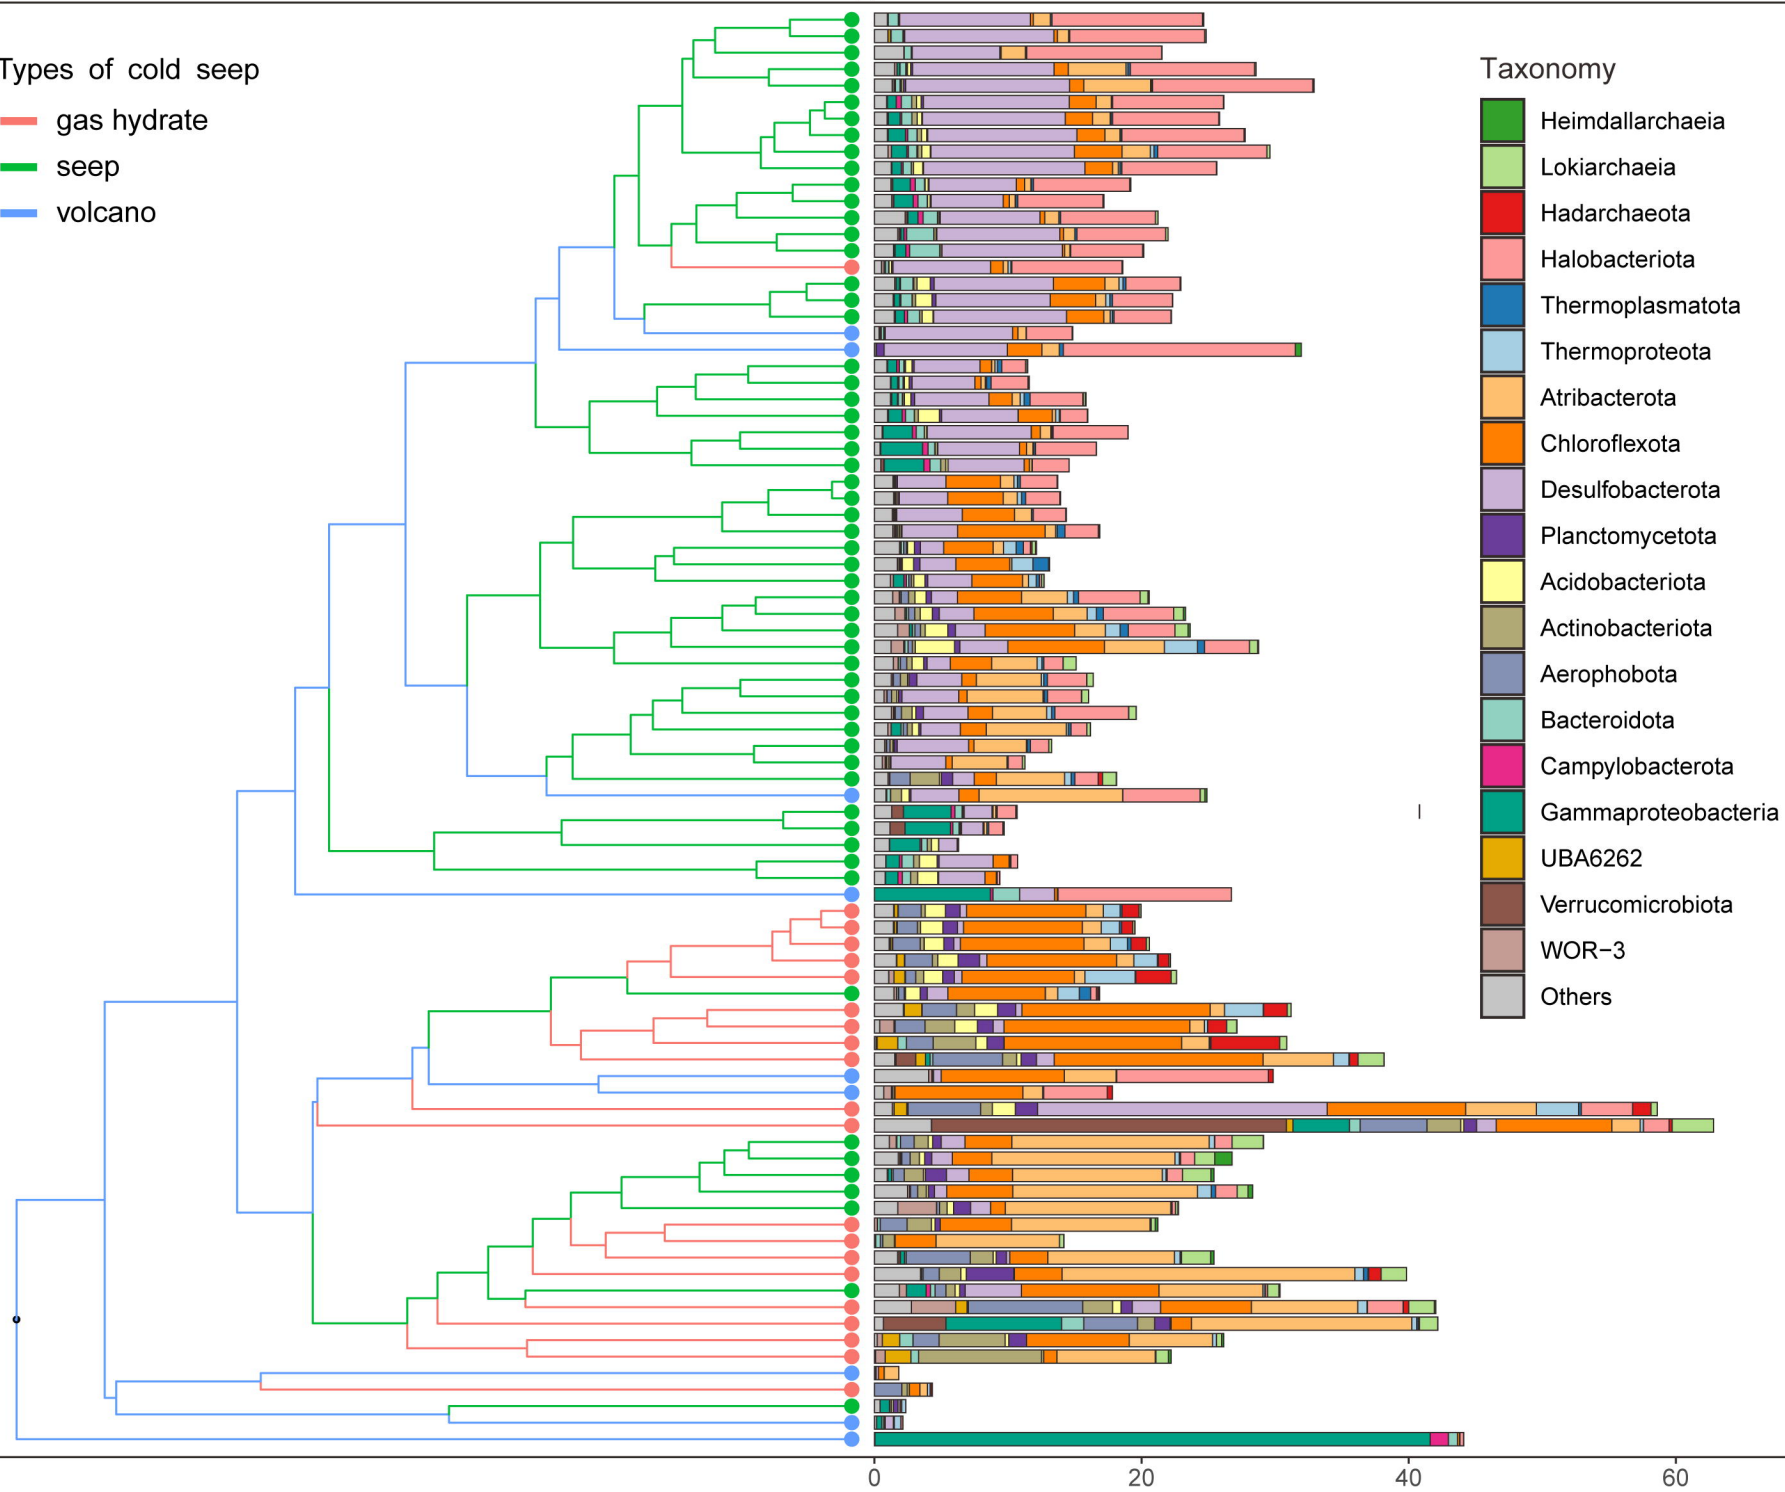

0

20

40

60

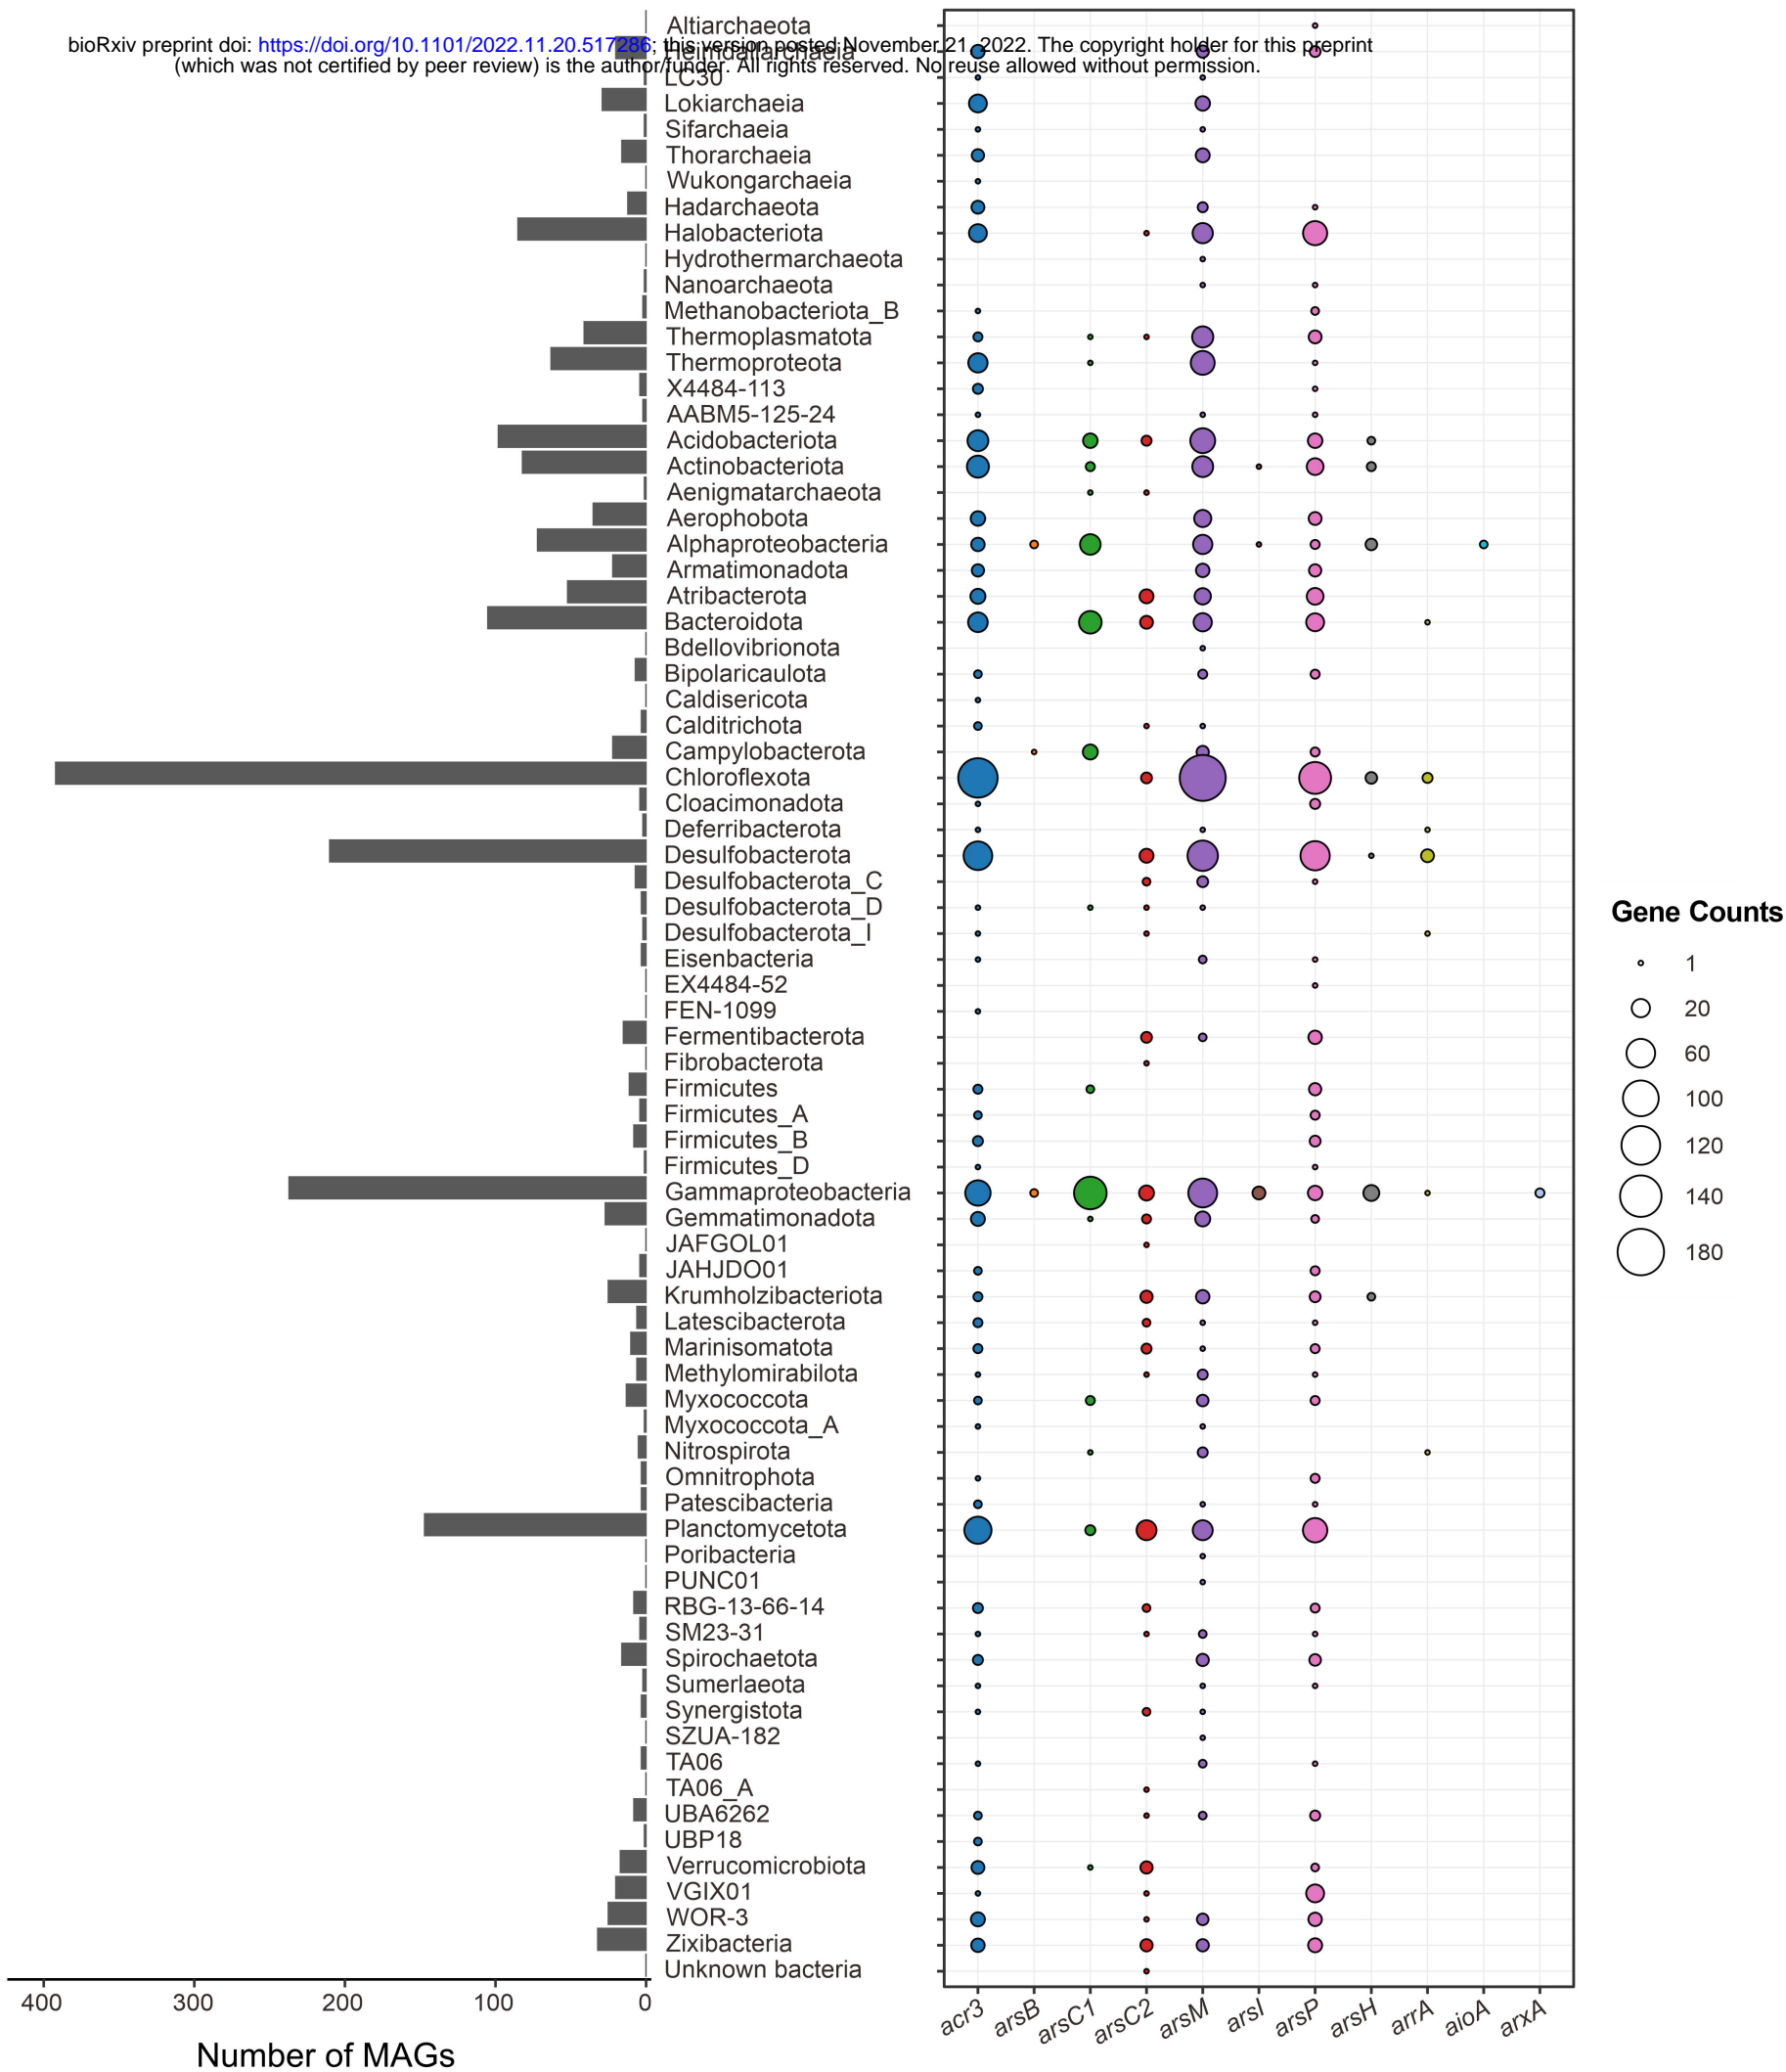

Source: https://www.biorxiv.org/content/10.1101/2022.11.20.517286v1.full.pdf
